# Supplementary material
Source: PubMed Central journal article supplement (PMC1474782)
Supplement: mbc_E06-01-0089_6.pdf [file mbc_E06-01-0089_6.pdf]

**Table S1**

|                                                | <b>G/N</b>     | <b>%</b>   |
|------------------------------------------------|----------------|------------|
| <b>PITP<math>\beta</math></b>                  | <b>233/35</b>  | <b>87%</b> |
| <b>PITP<math>\alpha</math></b>                 | <b>90/511</b>  | <b>13%</b> |
| <b>PITP<math>\beta</math><sup>S262A</sup></b>  | <b>181/38</b>  | <b>79%</b> |
| <b>PITP<math>\beta</math><sup>S262D</sup></b>  | <b>162/41</b>  | <b>80%</b> |
| <b>PITP<math>\beta</math><sup>S262E</sup></b>  | <b>102/22</b>  | <b>71%</b> |
| <b>PITP<math>\beta</math><sup>S262P</sup></b>  | <b>330/42</b>  | <b>88%</b> |
| <b>PITP<math>\alpha</math><sup>P263S</sup></b> | <b>164/614</b> | <b>21%</b> |
| <b>PITP<math>\alpha</math><sup>P263E</sup></b> | <b>156/567</b> | <b>22%</b> |
