# Supplementary material
Source: PubMed Central journal article supplement (PMC1474782)

**Figure S1**

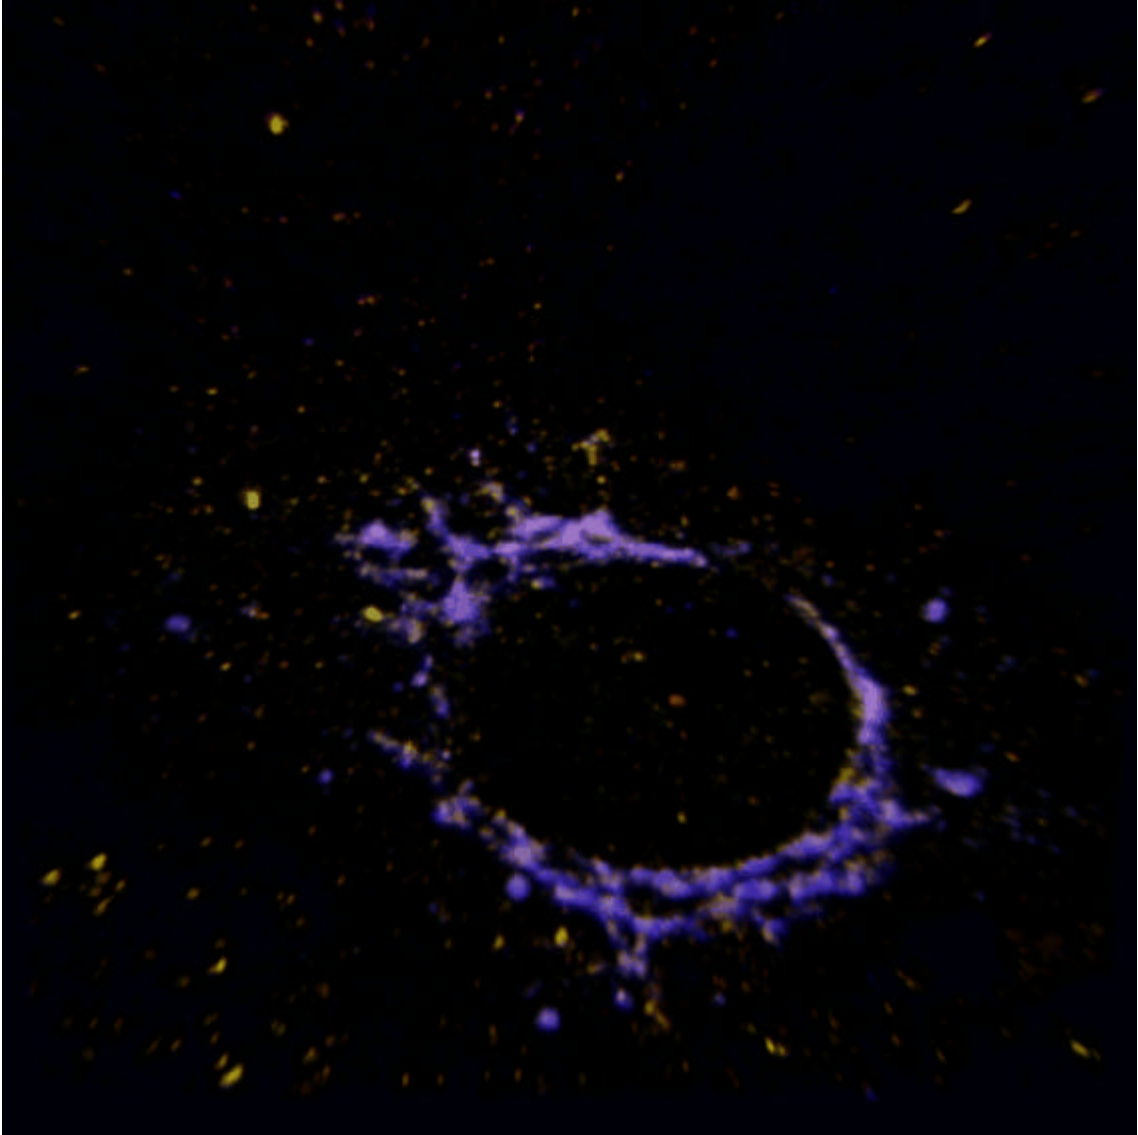

Supplement: mbc_E06-01-0089_1.pdf [file mbc_E06-01-0089_1.pdf]

**Figure S2**

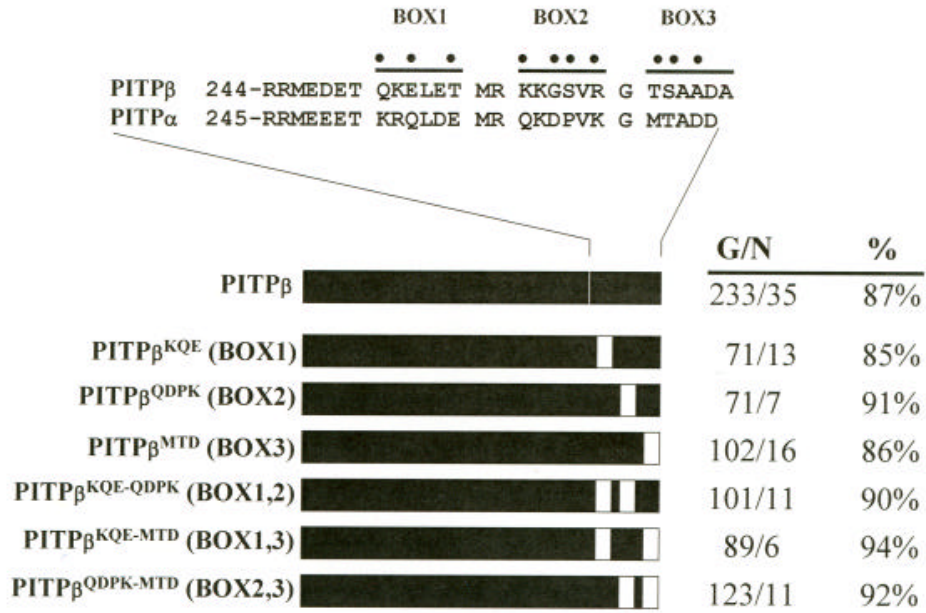

Supplement: mbc_E06-01-0089_2.pdf [file mbc_E06-01-0089_2.pdf]

**Figure S3**

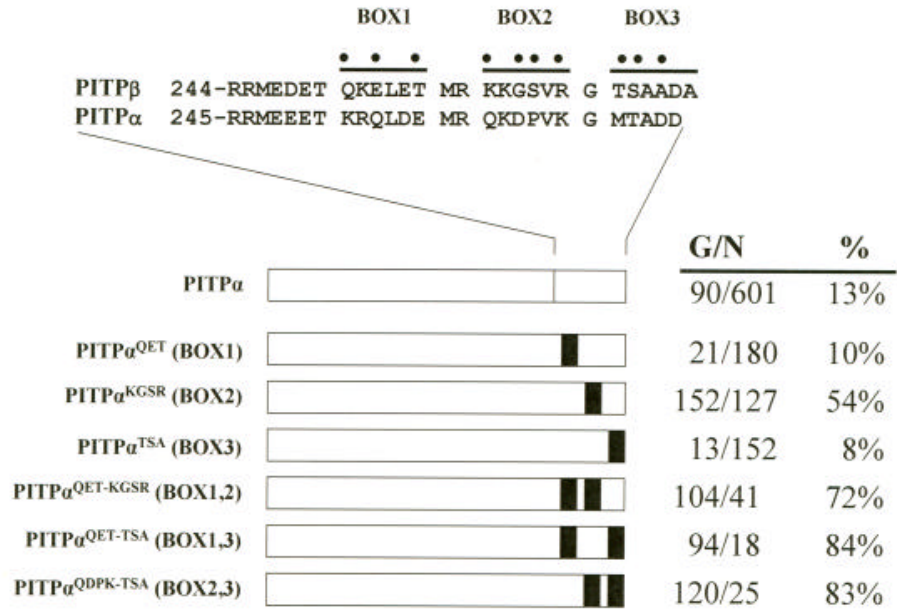

Supplement: mbc_E06-01-0089_3.pdf [file mbc_E06-01-0089_3.pdf]

## Figure S4

A.

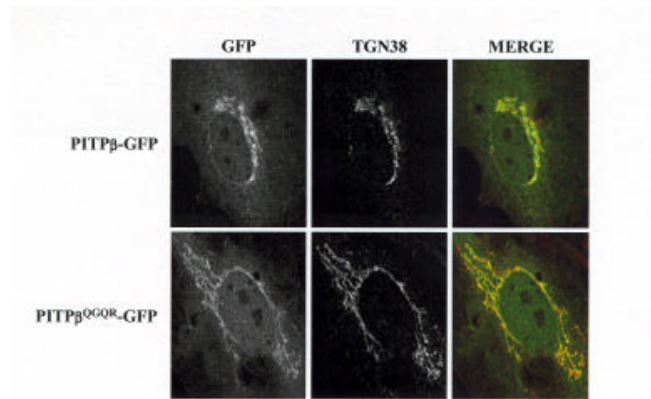

B.

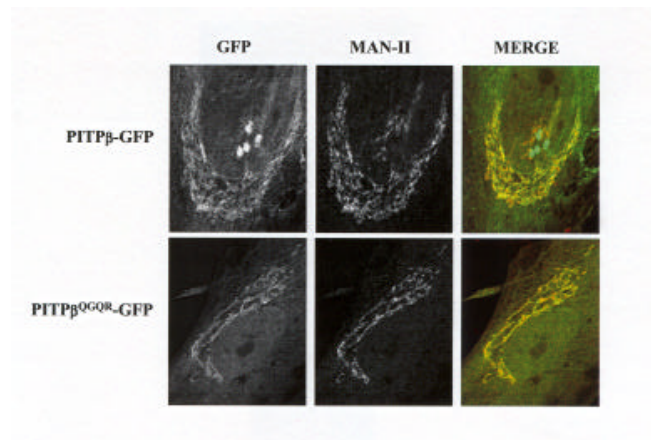

C.

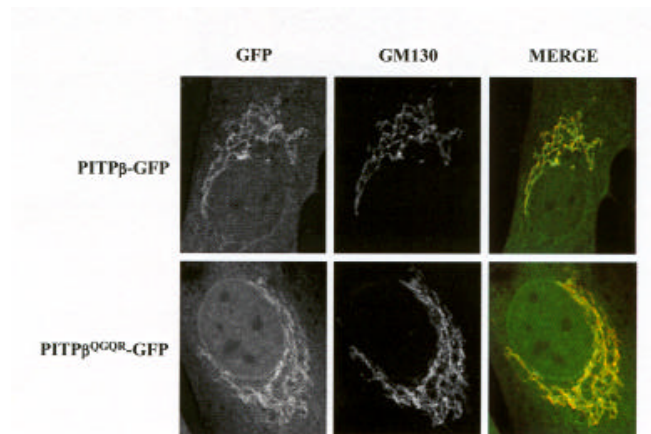

Supplement: mbc_E06-01-0089_4.pdf [file mbc_E06-01-0089_4.pdf]

**Figure S5**

**A.**

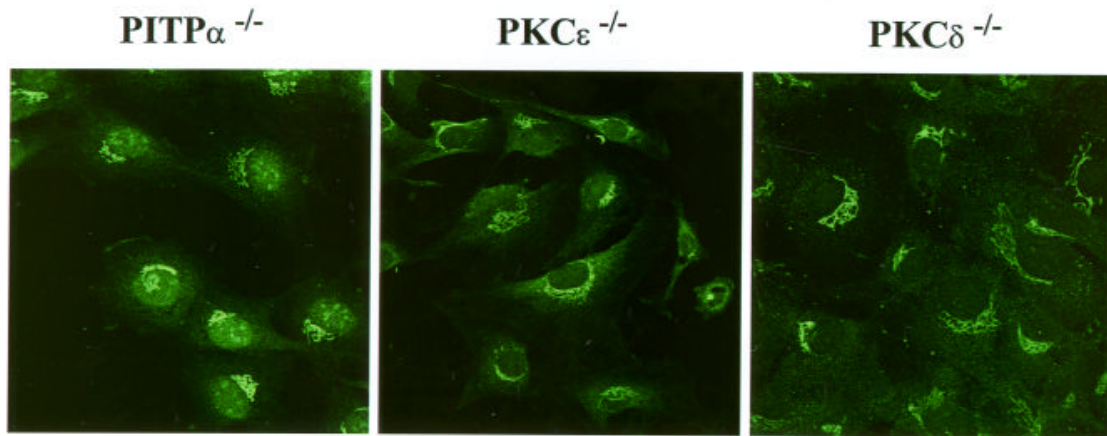

**B.**

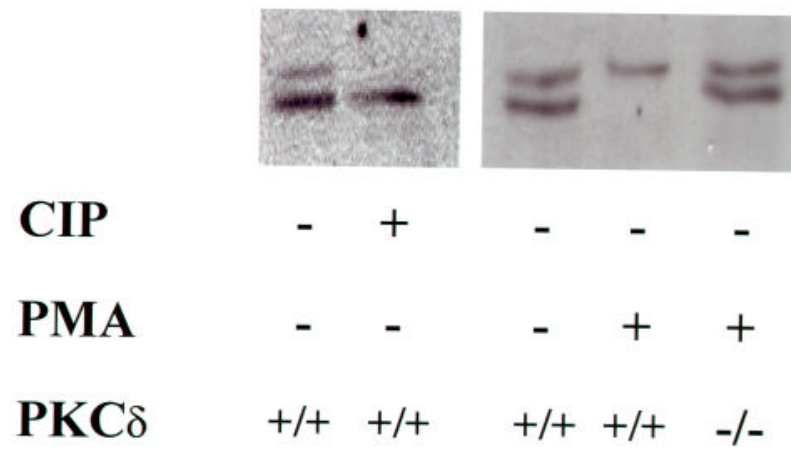

Supplement: mbc_E06-01-0089_5.pdf [file mbc_E06-01-0089_5.pdf]
